# Supplementary material
Source: publisher site journal article supplement (https://www.dovepress.com/article/327598)
Supplement: Supplementary file 1 [file get_supplementary_file.php]

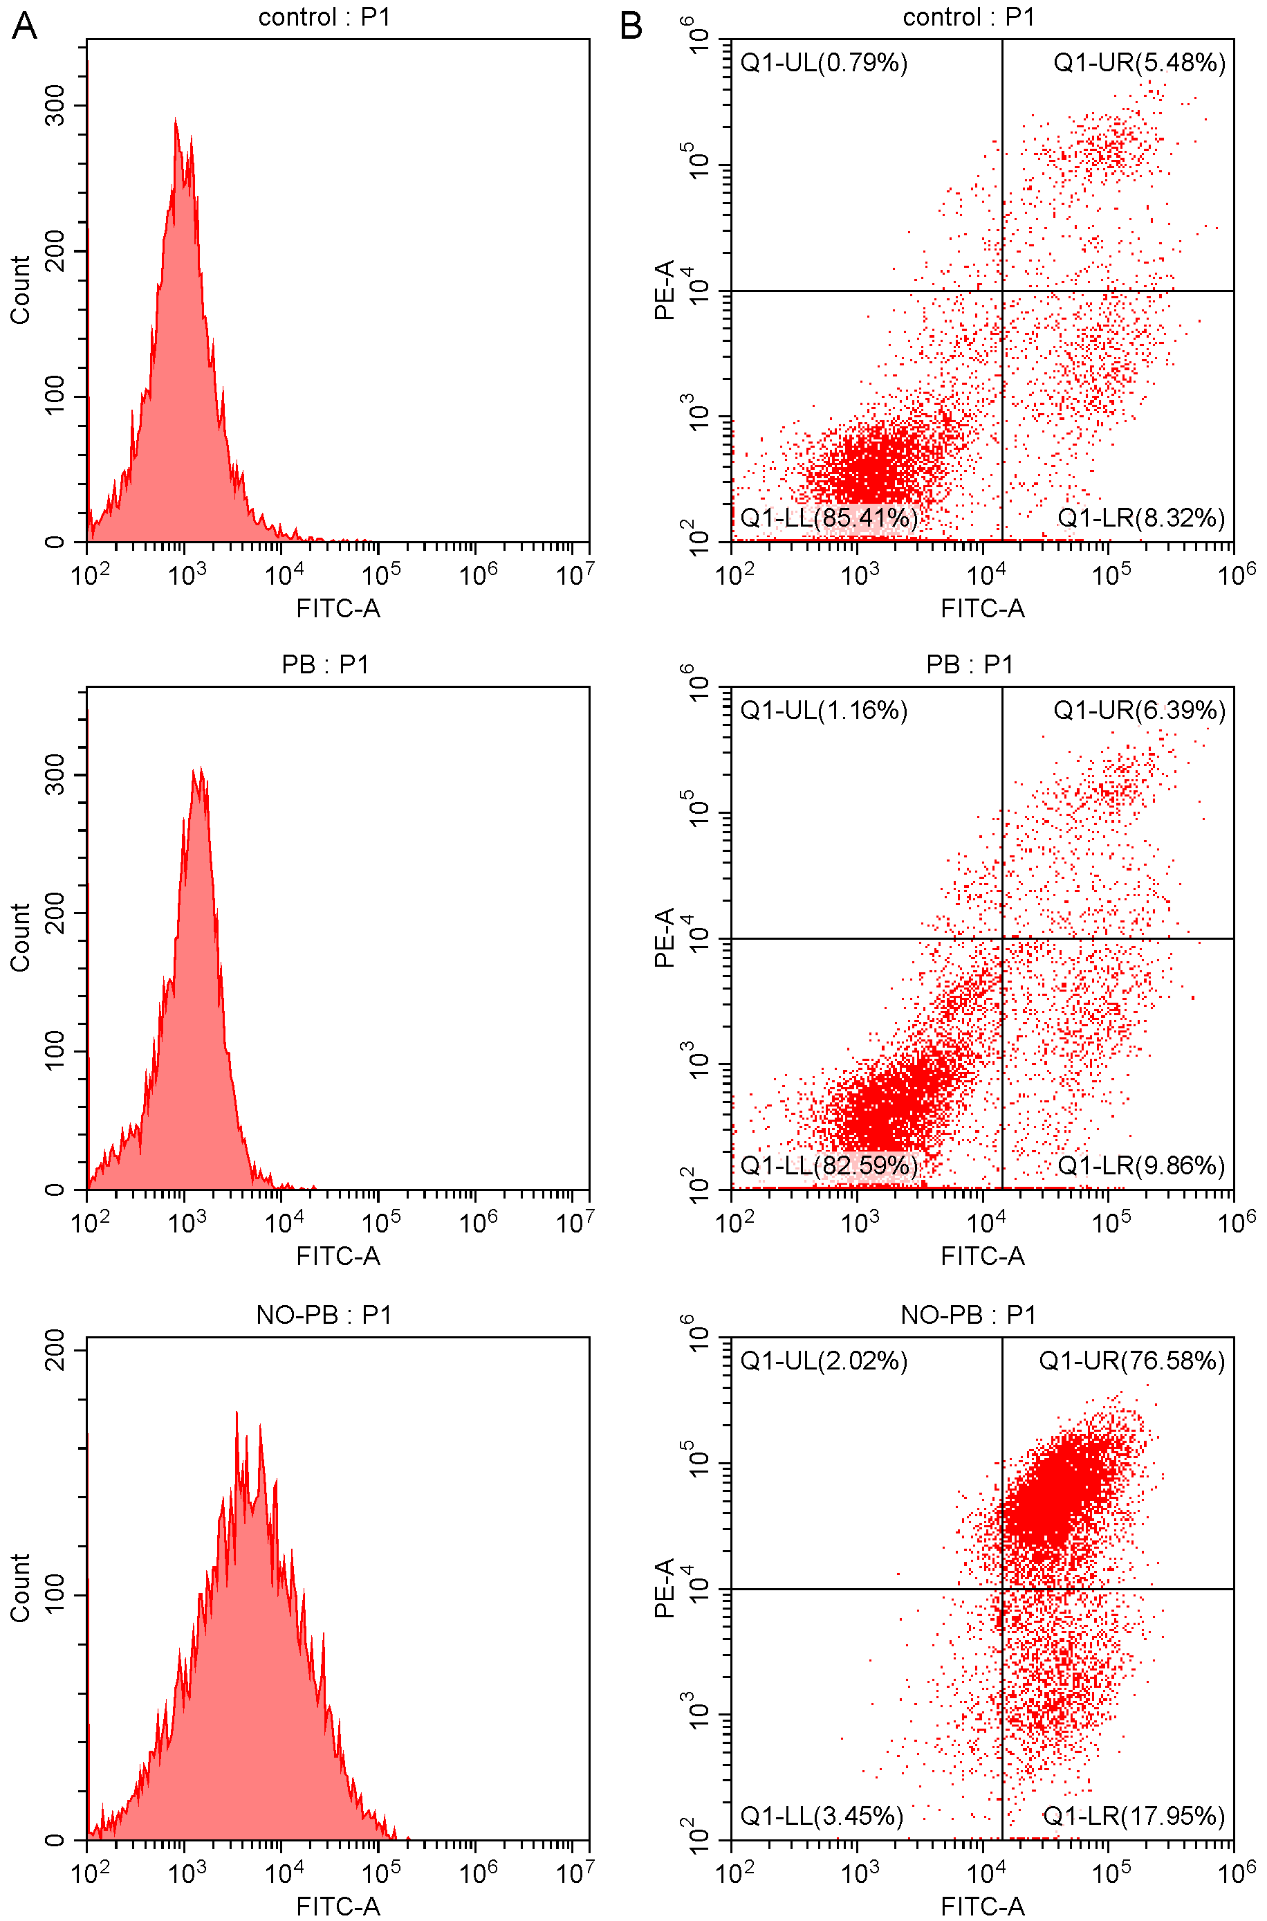


Fig. S1 A) The NO generation in the 4T1 cells detected by the fluorescence probe DAF-FM DA; B) The cell apoptosis by the Annexin V-FITC/PI kit.


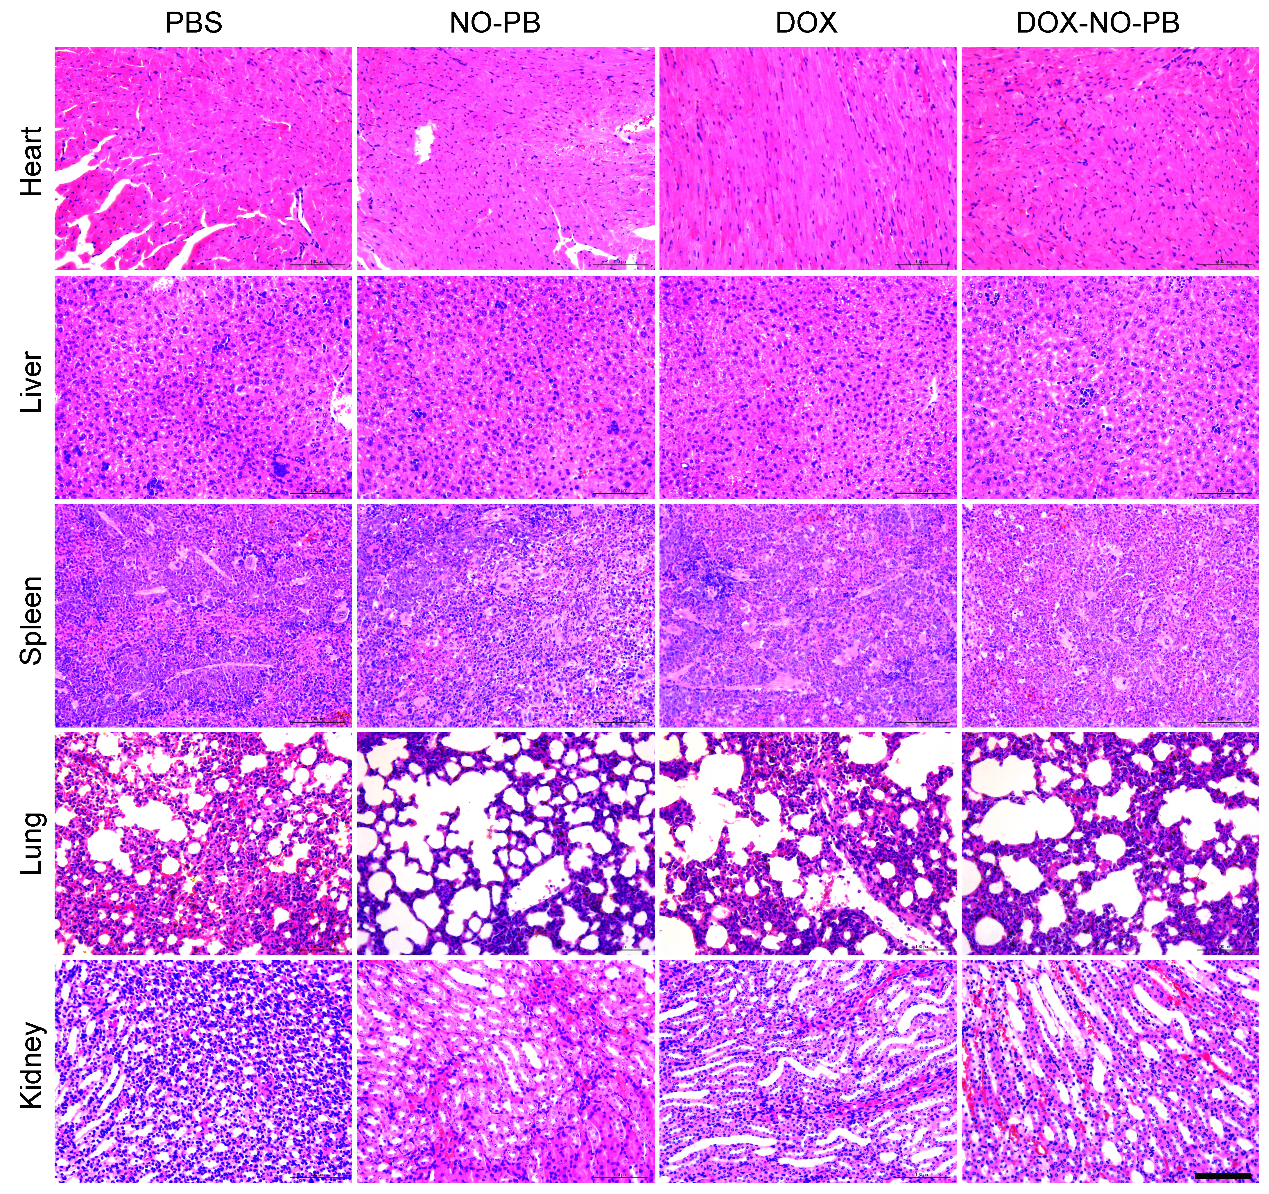


Fig. S2 The H & E images of the main organs of the mice at the end of the antitumor experiment (the scale bar represents 100 µm).
